# Supplementary material for: Low-Carbohydrate Diet among Children with Type 1 Diabetes: A Multi-Center Study
Source: MDPI journal article supplement (doi:10.3390/nu13113903), 2021-10-30
Supplement: s1 [file s1]

Supplementary Table S1

Comparison of questionnaire respondents (N=624) to non-respondents (N=634). Data are shown as median (IQR).

|                         | <b>Respondents</b>                      | <b>Non-respondents</b>                  | <b><i>p</i>-value</b> |
|-------------------------|-----------------------------------------|-----------------------------------------|-----------------------|
| <b>Subjects</b>         | N = 624                                 | N = 634                                 |                       |
| <b>Sex</b>              | F = 308 (49.4%)<br>M = 316 (50.6%)      | F = 320 (50.5%)<br>M = 314 (49.5%)      | 0.69                  |
| <b>Age</b>              | 12.2 (6.2)                              | 13.3 (6.4)                              | 0.002**               |
| <b>Age at T1D onset</b> | 6.4 (6.2)                               | 6.4 (6.2)                               | 0.83                  |
| <b>Duration of T1D</b>  | 4.5 (5.3)                               | 5.2 (6.3)                               | 0.008**               |
| <b>Treatment type</b>   | MDI = 370 (59.4%)<br>CSII = 253 (40.6%) | MDI = 415 (65.5%)<br>CSII = 219 (34.5%) | 0.03*                 |
| <b>HbA1c (mmol/mol)</b> | 50.0 (14.0)                             | 54.5 (16.0)                             | < 0.001***            |
| <b>HbA1c (%)</b>        | 6.7 (3.4)                               | 7.1 (3.6)                               | < 0.001***            |

CSII = continuous subcutaneous insulin infusion, F = female, M = male, MDI = multiple daily injection, T1D = type 1 diabetes

\* $p < 0.05$ , \*\* $p < 0.01$ , \*\*\* $p < 0.001$

Supplementary Table S2

Comparison of subjects on very low-carbohydrate diet (N=5) vs. low-carbohydrate diet subjects (N=31). Data are shown as median (IQR).

|                                                    | <b>Very low-carbohydrate diet</b> | <b>Low-carbohydrate diet</b>         | <b><i>p</i>-value</b> |
|----------------------------------------------------|-----------------------------------|--------------------------------------|-----------------------|
| <b>Demographics</b>                                |                                   |                                      |                       |
| <b>Age at survey collection</b>                    | 9.0 (5.8)                         | 12.0 (5.7)                           | 0.3                   |
| <b>Sex</b>                                         | F = 2 (40%)<br>M = 3 (60%)        | F = 23 (74.2%)<br>M = 8 (25.8%)      | -                     |
| <b>Age at T1D onset (years)</b>                    | 5.9 (5.7)                         | 8.3 (7.4)                            | 0.46                  |
| <b>T1D duration (years)</b>                        | 3.2 (0.1)                         | 3.2 (2.9)                            | 0.75                  |
| <b>Anthropometric data</b>                         |                                   |                                      |                       |
| <b>Body height SDS</b>                             | -0.4 (0.9)                        | -0.3 (1.2)                           | 1.00                  |
| <b>Body weight SDS</b>                             | 1.8 (1.7)                         | 0.4 (1.1)                            | 0.22                  |
| <b>Body mass index SDS</b>                         | 1.4 (1.0)                         | 0.4 (1.1)                            | 0.21                  |
| <b>Systolic arterial blood pressure (centile)</b>  | 81 (12.5)                         | 38.5 (63.2)                          | 0.08                  |
| <b>Diastolic arterial blood pressure (centile)</b> | 72.5 (24.2)                       | 59.5 (35.8)                          | 0.22                  |
| <b>LCD data</b>                                    |                                   |                                      |                       |
| <b>Daily carbohydrate intake</b>                   | 35 (14.0)                         | 100 (31)                             | < 0.001***            |
| <b>Age at LCD start</b>                            | 6.3 (5.6)                         | 11.4 (6.1)                           | 0.1                   |
| <b>LCD duration (years)</b>                        | 3.0 (0.5)                         | 0.9 (1.5)                            | 0.004**               |
| <b>Treatment and T1D control</b>                   |                                   |                                      |                       |
| <b>Treatment type</b>                              | MDI = 4 (80%)<br>CSII = 1 (20%)   | MDI = 23 (74.1%)<br>CSII = 8 (25.8%) | -                     |

|                                                      |             |             |      |
|------------------------------------------------------|-------------|-------------|------|
| <b>Bolus insulin (units daily)</b>                   | 6.8 (4.1)   | 10.2 (9.2)  | 0.18 |
| <b>Basal insulin (units daily)</b>                   | 8.2 (5.6)   | 12.9 (10.6) | 0.31 |
| <b>Total insulin daily dose (units/kg/day)</b>       | 0.5 (0.1)   | 0.6 (0.3)   | 0.15 |
| <b>Last HbA1c (mmol/mol)</b>                         | 38.0 (10.0) | 45.0 (9.5)  | 0.15 |
| <b>Last HbA1c (%)</b>                                | 5.6 (3.1)   | 6.3 (3.0)   | 0.15 |
| <b>Average HbA1c during the last year (mmol/mol)</b> | 43.0 (10.0) | 49.0 (11.9) | 0.16 |
| <b>Average HbA1c during the last year (%)</b>        | 6.1 (3.1)   | 6.6 (3.2)   | 0.16 |
| <b>CGM data</b>                                      |             |             |      |
| <b>Time in range 3.9-10.0 mmol/l (%)</b>             | 74.0 (1.1)  | 74.0 (16.1) | 0.89 |
| <b>Time below 3.9 mmol/l (%)</b>                     | 15.0 (18.0) | 6.0 (6.8)   | 0.12 |
| <b>Time below 3.0 mmol/l (%)</b>                     | 5.0 (6.2)   | 2.0 (3.0)   | 0.30 |
| <b>Time above 10.0 mmol/l (%)</b>                    | 2.0 (15.0)  | 17.0 (14.4) | 0.12 |
| <b>Time above 13.9 mmol/l (%)</b>                    | 0.0 (2.0)   | 2.0 (3.0)   | 0.33 |
| <b>Average glycemia (mmol/l)</b>                     | 5.5 (1.6)   | 7.3 (1.1)   | 0.12 |
| <b>Standard deviation of glycemia</b>                | 2.1 (1.1)   | 2.7 (0.9)   | 0.18 |
| <b>Coefficient of variation (%)</b>                  | 32.0 (10.0) | 37.7 (7.2)  | 0.42 |
| <b>Lipid spectrum</b>                                |             |             |      |
| <b>Total cholesterol (mmol/l)</b>                    | 5.4 (0.7)   | 4.7 (0.8)   | 0.05 |
| <b>Triglycerides (mmol/l)</b>                        | 1.4 (0.5)   | 0.9 (0.4)   | 0.10 |
| <b>HDL cholesterol (mmol/l)</b>                      | 1.3 (0.2)   | 1.5 (0.5)   | 0.08 |
| <b>LDL cholesterol (mmol/l)</b>                      | 3.2 (0.8)   | 2.6 (1.0)   | 0.57 |

CGM = continuous glucose monitoring, CSII = continuous subcutaneous insulin infusion, F = female, IQR = interquartile ratio, HDL = high density lipoprotein, LCD = low-carbohydrate diet, LDL = low density lipoprotein, M = male, MDI = multiple daily injection, SDS = standard deviation score, T1D = type 1 diabetes, VLCD = very low-carbohydrate diet

\*p <0,05, \*\*p <0,01, \*\*\*p <0,001
